# Supplementary material
Source: PubMed Central journal article supplement (PMC8018329)

Supplemental Figure for:  
Analysis of the role of plasma 25hydroxyvitamin D levels in survival outcomes in patients from phase III MPACT trial of metastatic pancreatic cancer  
Daniel Von Hoff et al.

**Supplemental Figure 1.** CONSORT diagram of patients in the current analysis. <sup>a</sup> One patient randomized to gemcitabine (Gem) was treated with *nab*-paclitaxel (*nab*-P) plus Gem. In the intent-to-treat analysis, this patient was categorized as randomized. In all analyses of the treated population, this patient was categorized as treated. 25(OH)D, 25-hydroxyvitamin D.

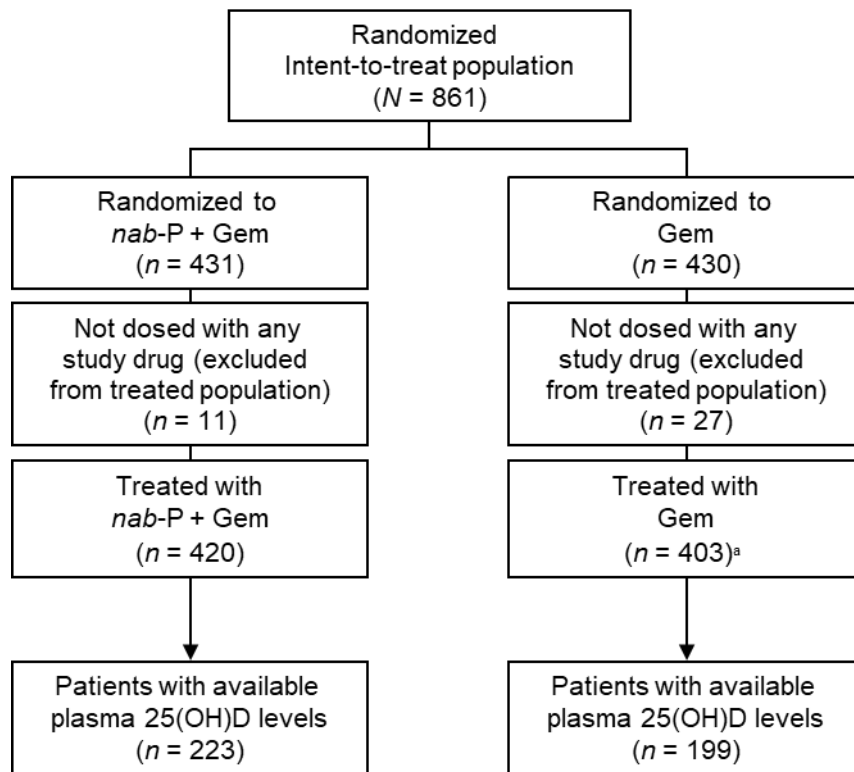

Supplement: ONCO-26-e704-s001.pdf [file ONCO-26-e704-s001.pdf]
